# Supplementary material for: Structures of Bacterial RNA Polymerase Complexes Reveal the Mechanism of DNA Loading and Transcription Initiation
Source: PubMed Central journal article supplement (PMC6028918; doi:10.1016/j.molcel.2018.05.021), 2018-06-21
Supplement: mmc1.pdf [file mmc1.pdf]

**Molecular Cell, Volume 70**

**Supplemental Information**

**Structures of Bacterial RNA Polymerase  
Complexes Reveal the Mechanism of DNA  
Loading and Transcription Initiation**

**Robert Glyde, Fuzhou Ye, Milija Jovanovic, Ioly Kotta-Loizou, Martin Buck, and Xiaodong Zhang**

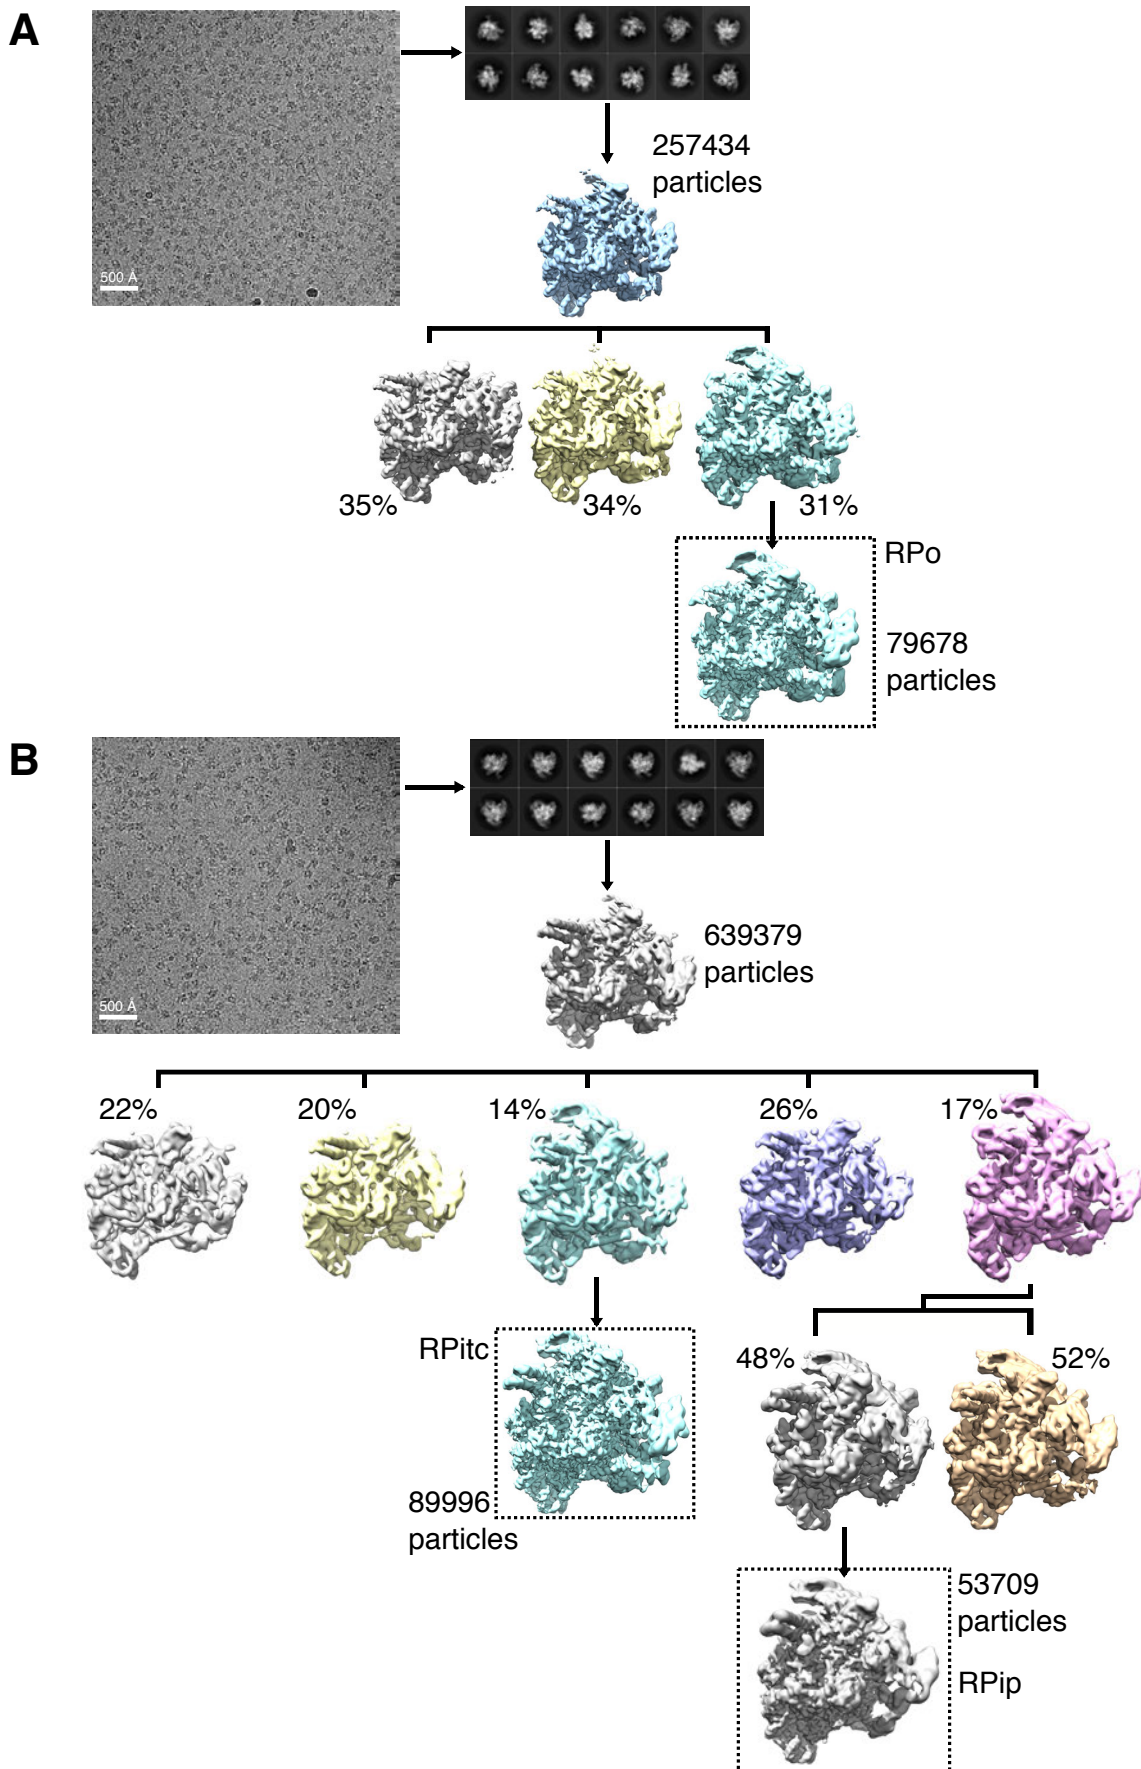

**Figure S1, related to Figure 1, Table 1. CryoEM image processing. A) RPo, B) RPip and RPitc.** Shown are typical micrographs, 2D class averages, initial refined 3D reconstructions, 3D classes and final refined 3D models.

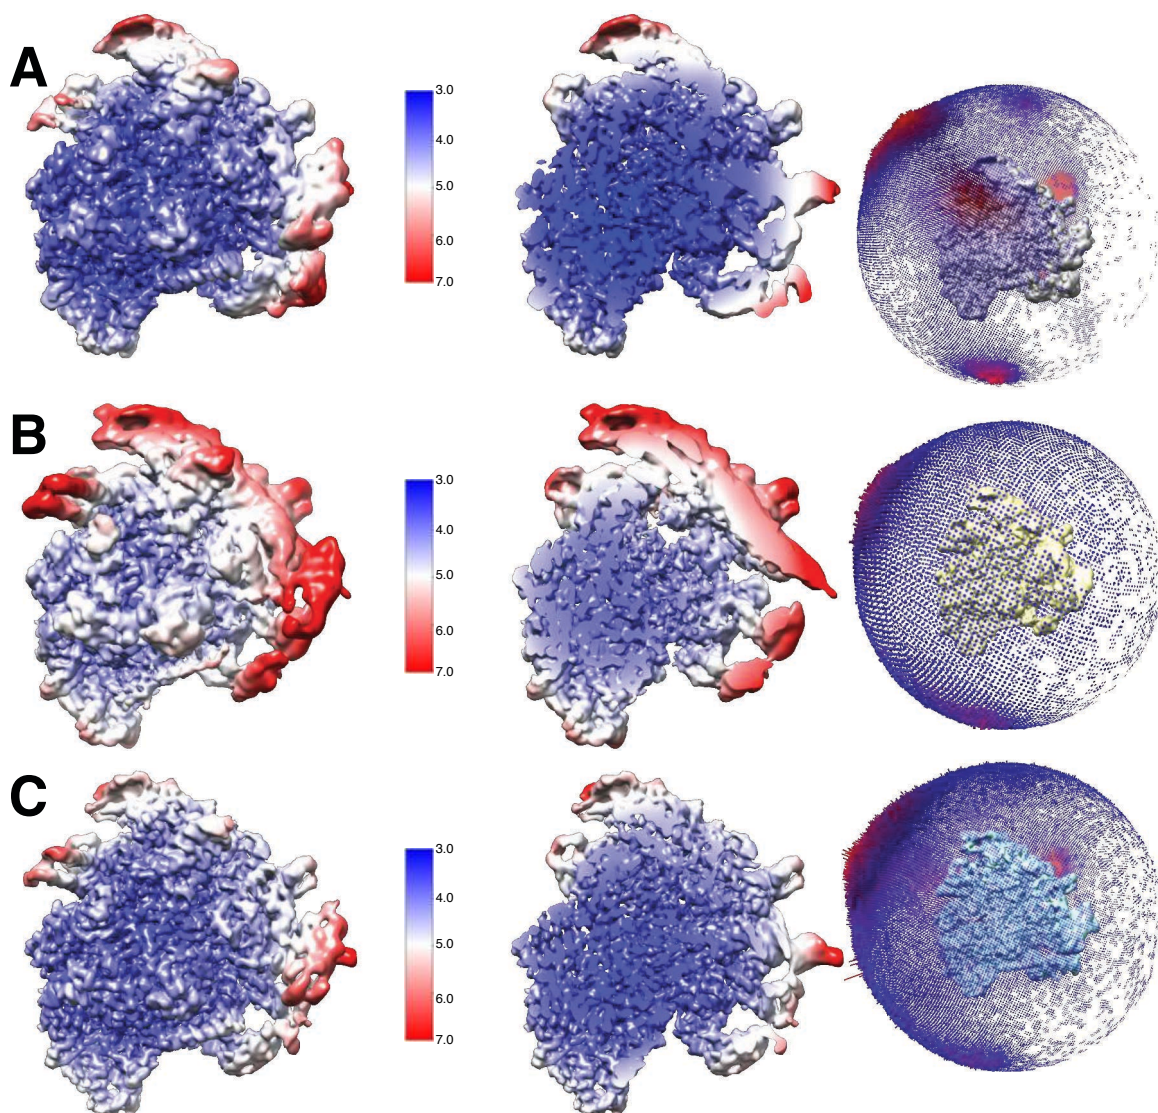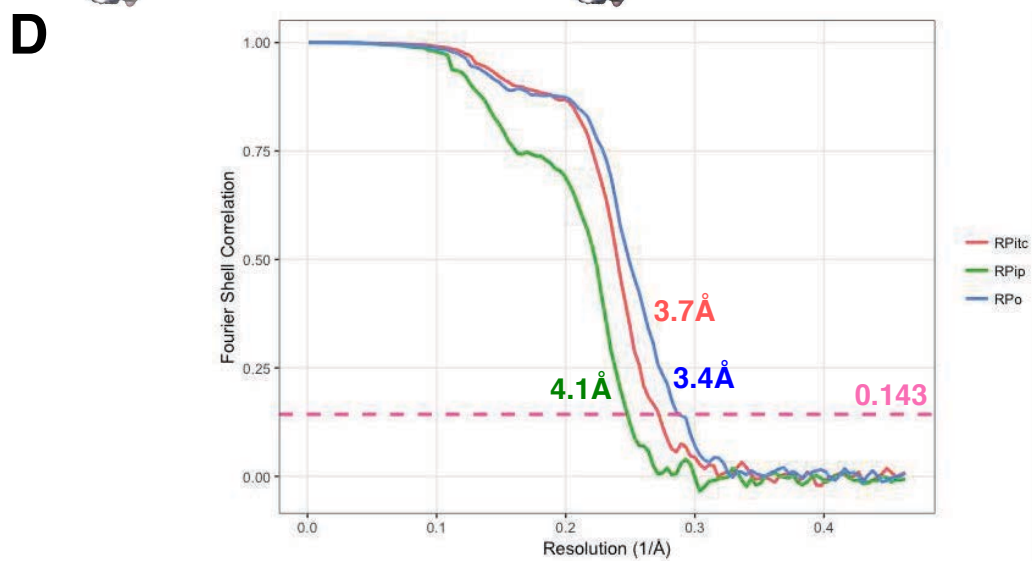

**Figure S2, related to Figure 1 and Table1. Quality of the reconstructions. A) RPo, B) RPip and C) RPitc.** Shown are local resolution map on surface and through the centre sections, angular distribution of all the particles used in final reconstructions. **D) Fourier**



shell correlation coefficients (FSC) of two half maps and the resolution based on 0.143 criteria.

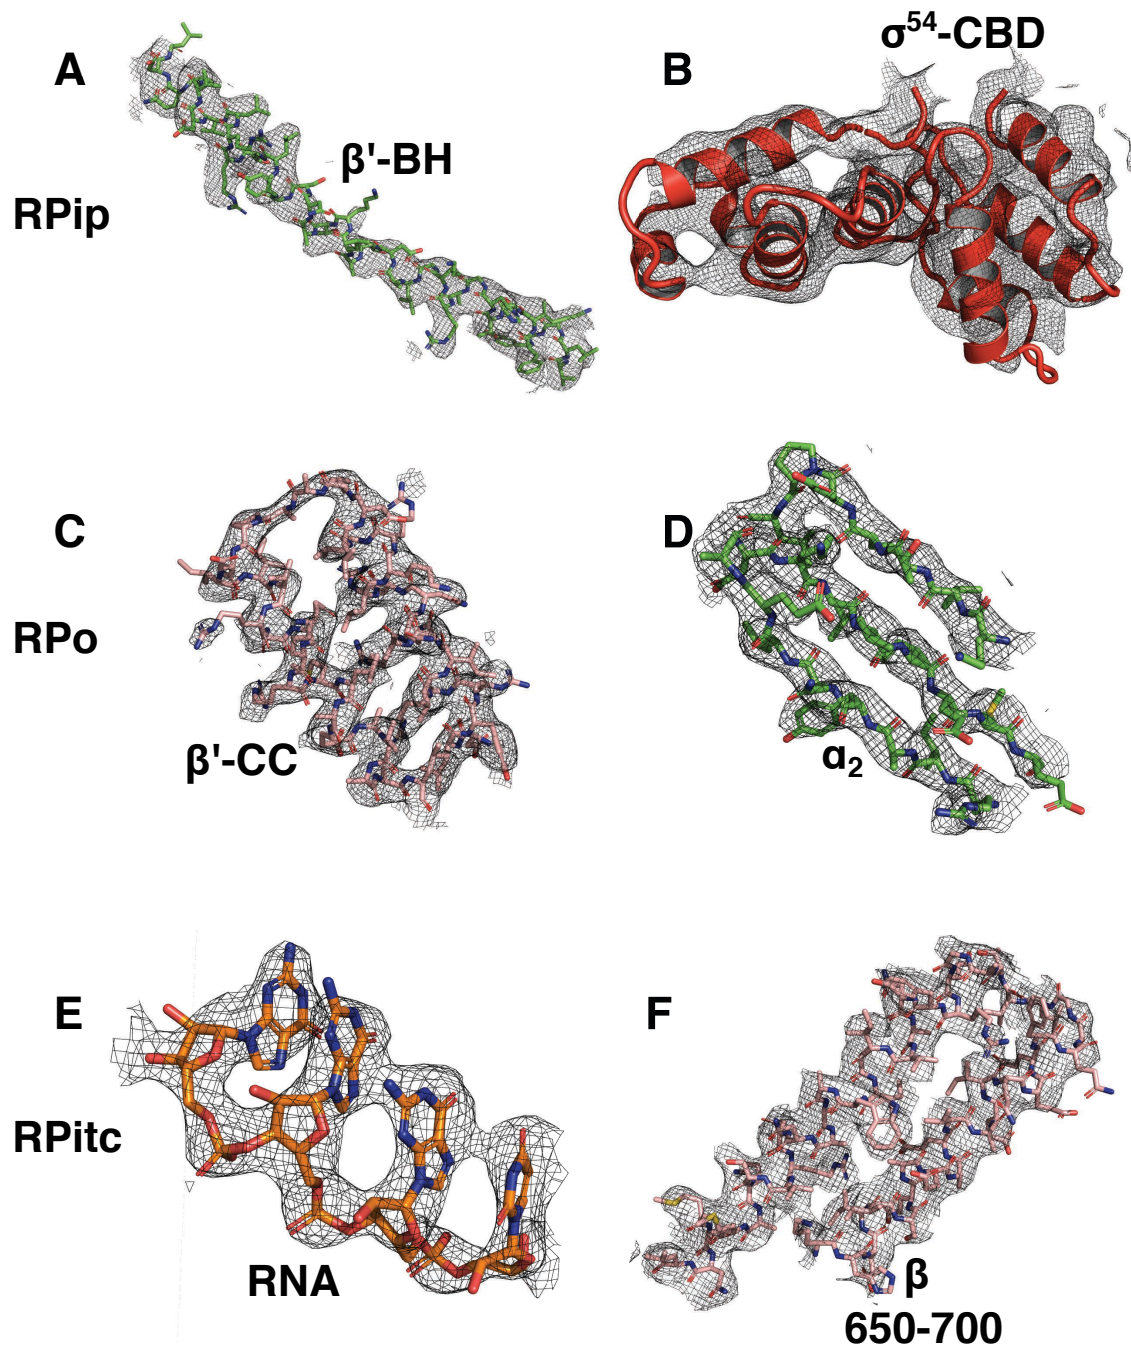

Figure S3, related to Figure 1 and Table 1. Example electron density map of representative regions. A)-B) RPiP, C)-D) RPo and E)-F) RPitc. Density for synthesized RNA can be clearly seen (E).

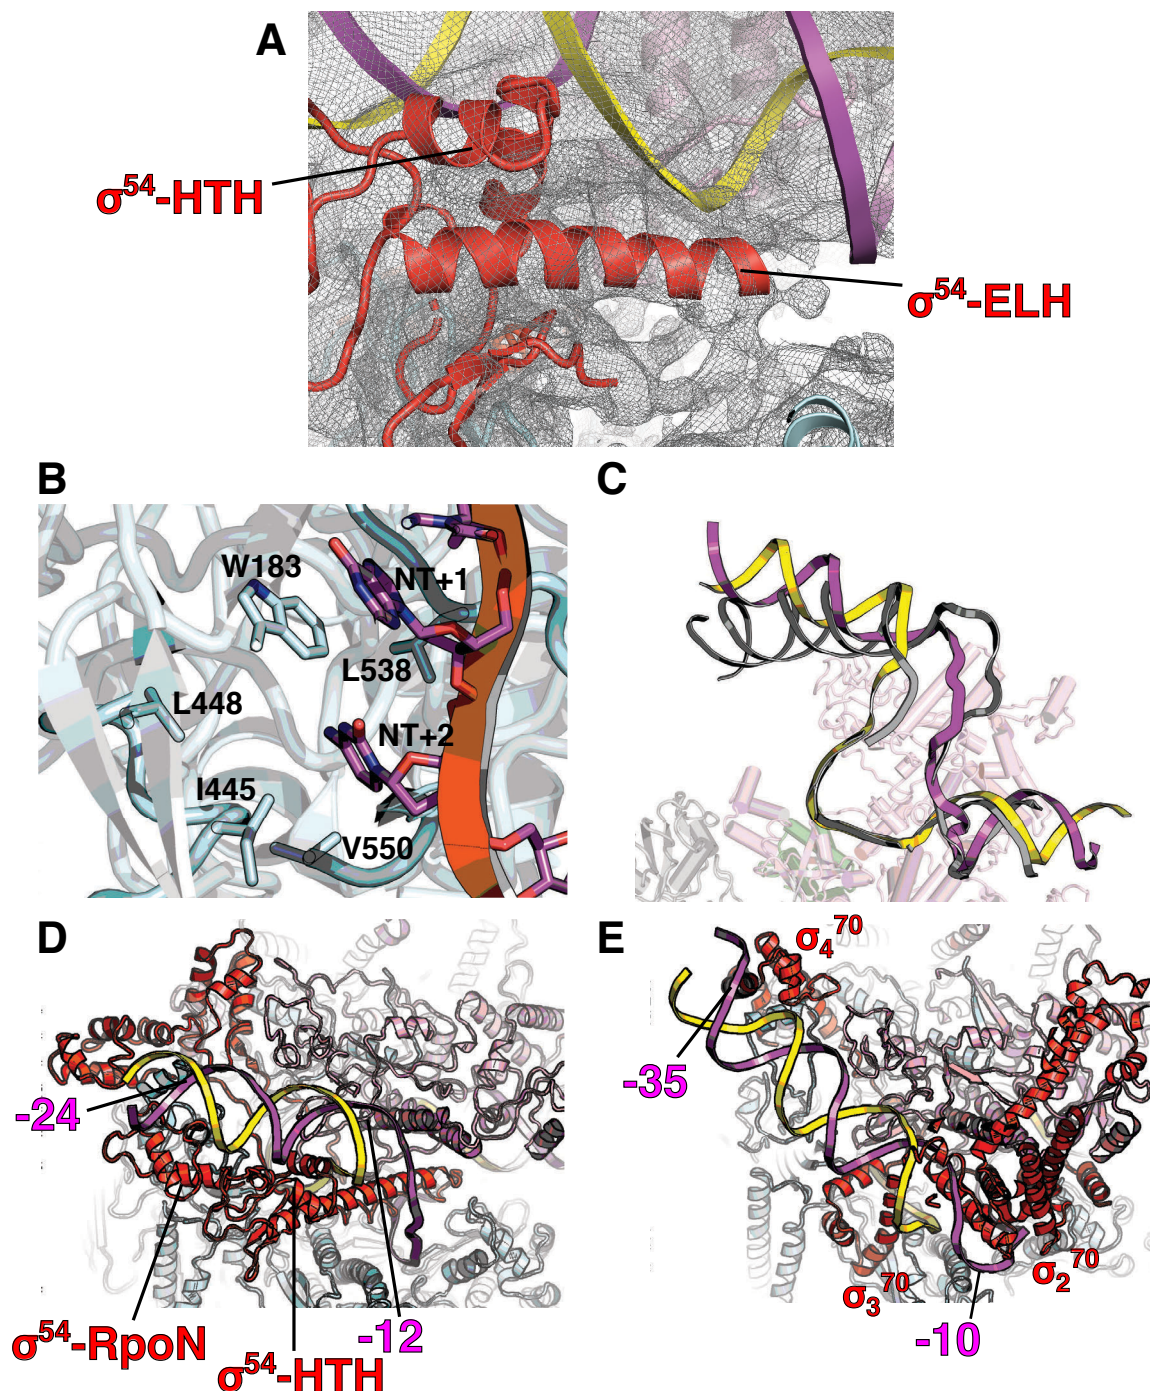

**Figure S4, related to Figure 2 and Figure 3. Transcription bubble stabilisation in RNAP- $\sigma^{54}$  RPo/RPitc and comparisons with RNAP- $\sigma^{70}$  RPo/RPitc. A)** Electron density suggests alternative path for ELH in RPitc compared to those in RPiC or RPo and RPitc. **B)** Downstream ss-dsDNA junction in RPo. +2 NT base is inserted into a hydrophobic pocket and +1 NT base forms hydrophobic-base interactions with W183 of  $\beta$ -subunit. **C)** Comparison of transcription bubble in RPitc (yellow – T strand, magenta – NT strand) with those of RNAP- $\sigma^{70}$  RPitc (4YLO, grey). **D)** Promoter binding in RNAP- $\sigma^{54}$  open complex, **E)** same view as in D) but with RNAP- $\sigma^{70}$  open complex.



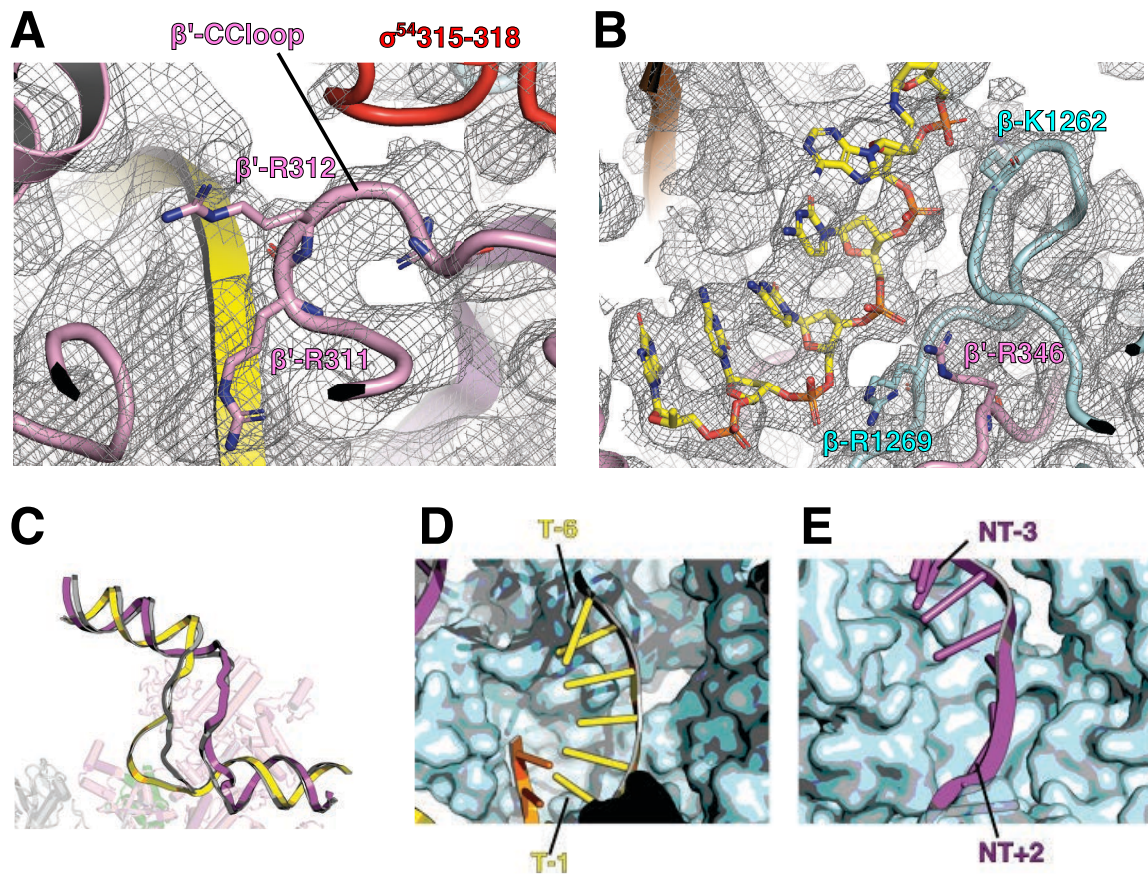

**Figure S5, related to Figure 4. DNA in *de novo* synthesizing initial transcribing complex (RPitc). A)** Role of the  $\beta'$  coiled coil loop in interacting with T-strand **B)** Template strand is further stabilised by positively charged residues in  $\beta$  and  $\beta'$  subunits. **C)** Comparisons of the transcription bubble in RPo (grey) and RPitc (yellow and magenta) showing that the template strand is expanded in RPitc, **D)** Cavity behind T strand that would accommodate the scrunched up DNA. **E)** Cavity behind NT strand.

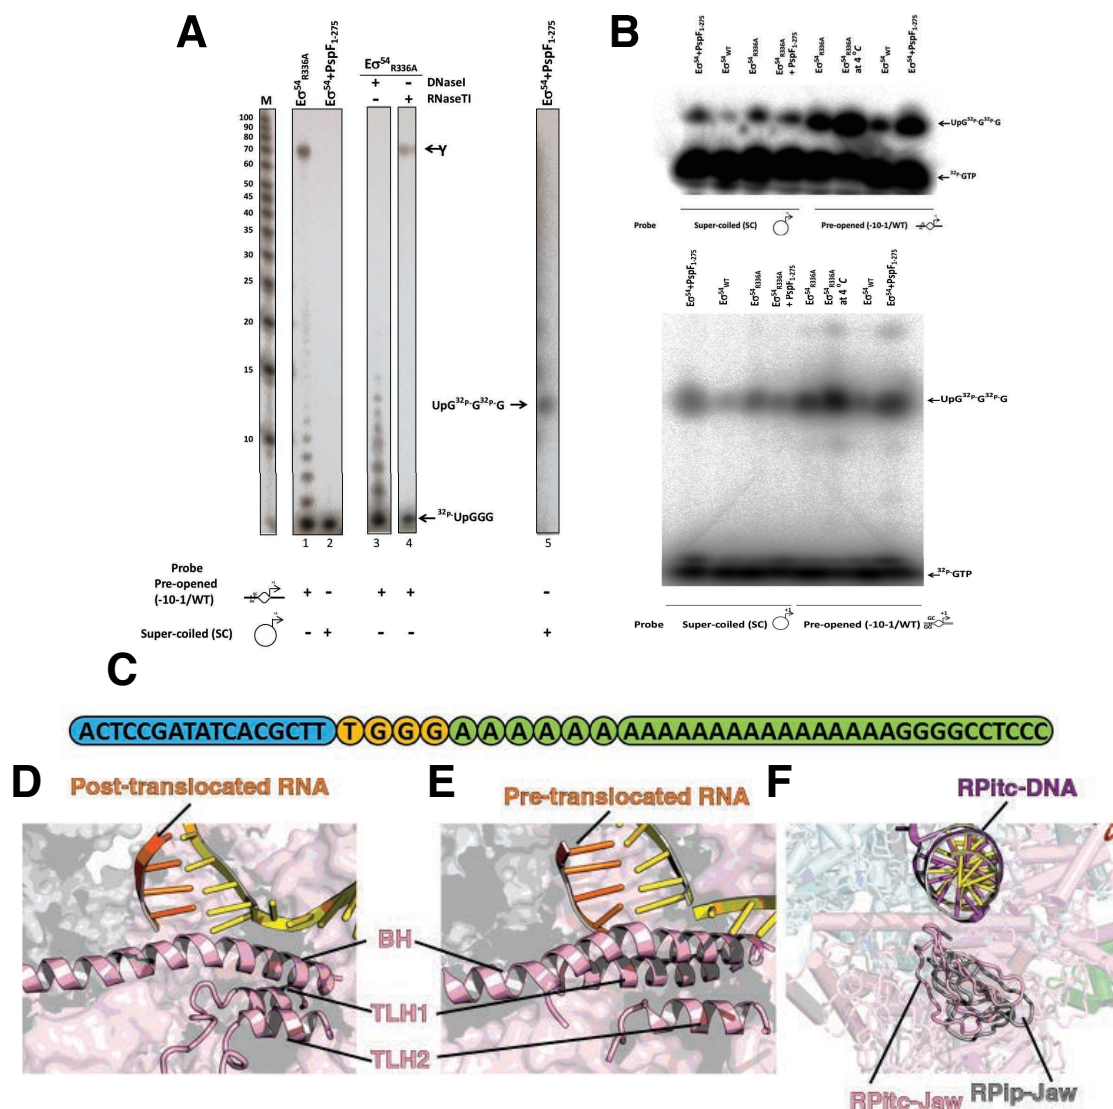

**Figure S6, related to Figure 4. *De novo* RNA synthesis and comparison with that of RNAP- $\sigma^{70}$ .** **A)** sp RNA produced from super-coiled (SC) *nifH* promoter template DNA and the pre-opened (-10-1/WT) linear DNA probes. sp RNA samples were labelled by kinasing, using the [ $\gamma$ - $^{32}$ P] ATP. Denaturing gel showing: lane 1- spRNA produced from RNAP (E)- $\sigma^{54}_{R336A}$  at 4 °C from pre-opened template, lane 2- spRNA produced from SC DNA in the presence of WT E $\sigma$  and PspF activator at 37 °C. A further control demonstrate that slower-migrating product (Y) is sensitive to DNaseI (lane 3) and spRNA is sensitive to RNaseT1 (lane 4) (1), lane5- spRNA produced from SC DNA in the presence of WT E $\sigma$ , PspF activator, and the [ $\alpha$ - $^{32}$ P] GTP at 37 °C with a 5'OH migrated slower than a marker's (M) 10 base long RNA band. **B).** Synthesis of the spRNA UpG $^{32p}$ G $^{32p}$ G. WT RNAP- $\sigma^{54}$  was used as negative control. Upper panel - short 20% denaturing gel, lower panel - long 20% denaturing gel. **C).** Exemplary result following RT-PCR, cloning and sequencing of the major RNA product (orange) of the transcription reaction, which is located between the adapter (blue) and the poly(A) tail/oligo(dT) primer (green). **D)** In RPitc, RNA-DNA structure in post-translocation position, trigger loop/helix in open conformation. **E)** RNAP- $\sigma^{70}$  RPitc, RNA-DNA structure in pre-translocation position, trigger loop/helix in closed conformation, **F)**  $\beta'$ -jaw domain comparisons between RNAP- $\sigma^{54}$  and  $\sigma^{70}$  RPitcs.



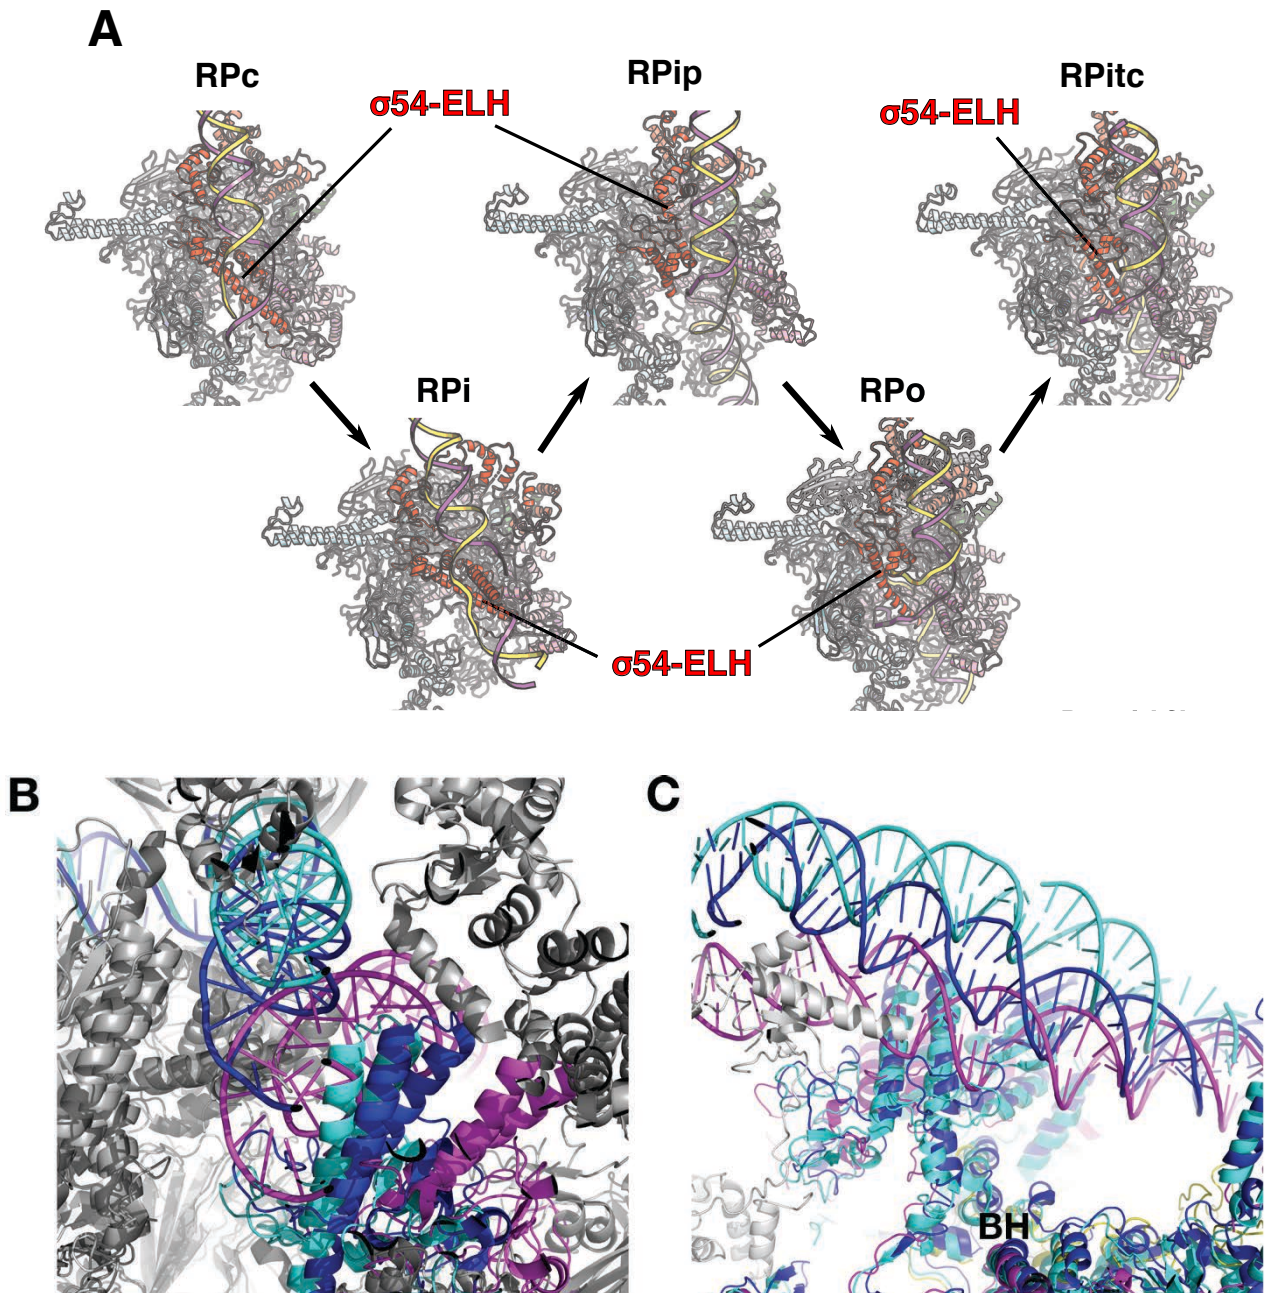

**Figure S7, related to Figure 5 and Figure 6. Coordinated movements during transcription initiation.** **A)** Coordinated movements of ELH, RNAP clamps and DNA during isomerisation in RNAP- $\sigma^{54}$  system. **B)** Comparisons of **RPip** (magenta) with **yeast Pol II CC** (pdbcode 5FZ5, cyan) and **human Pol II CC** (pdbcode 5IYA, blue) showing the clamp opening is correlated with DNA positioning. **C).** Same as in B) but viewed from  $\beta$  side. Structures are aligned on the bridge helix (BH). DNA and clamp are colored while other subunits are shown in grey.
